# Supplementary material for: Adipocyte-released insulin-like growth factor-1 is regulated by glucose and fatty acids and controls breast cancer cell growth in vitro
Source: PubMed Central journal article supplement — Diabetologia. 2012 Jul 15;55(10):2811–22. doi: 10.1007/s00125-012-2629-7 (PMC3433668; doi:10.1007/s00125-012-2629-7), 2012-07-15
Supplement: 125_2012_2629_MOESM3_ESM.pdf [file 125_2012_2629_MOESM3_ESM.pdf]

|                              |                                                                                          |
|------------------------------|------------------------------------------------------------------------------------------|
| Mouse IGF-1 primers          | Forward 5'-TGG ATG CTC TTC AGT TCG TG -3'<br>Reverse 5'-TTT TGT AGG CTT CAG TGG GG -3'   |
| Mouse KC primers             | Forward 5'-AGC CAC CCG CTC GCT TCT CT- 3'<br>Reverse 5'-TCG GTT TGG GTG CAG TGG GG- 3'   |
| Mouse RANTES primers         | Forward 5'-AGG AAC CGC CAA GTG TGT GCC- 3'<br>Reverse 5'-AGT GGC ATC CCC AAG CTG GC- 3'  |
| Mouse $\beta$ -actin primers | Forward 5'-GCGTGACATCAAAGAGAAG-3'<br>Reverse 5'-ACT GTG TTG GCA TAG AGG-3'               |
| Human IGF-1 primers          | Forward 5'-GCA GAA CCT GTT TGG CTC TC -3'<br>Reverse 5' -TAT GGT CTT TGC AAG GGA GG - 3' |
| Human IL-8 primers           | Forward 5'-TTC CAA GCT GGC CGT GGC TC- 3'<br>Reverse 5'-TGT GTT GGC GCA GTG TGG TCC- 3'  |
| Human RANTES primers         | Forward 5'-CAG CAC GTG GAC CTC GCA CA- 3'<br>Reverse 5'-GGCAGTGGGCGGGCAATGTA- 3'         |
| Human $\beta$ -actin primers | Forward 5'-GCGTGACATCAAAGAGAAG- 3'<br>Reverse 5'-ACTGTGTTGGCATAGAGG- 3'                  |

*ESM Table 1. Primer sequences used in Real-time RT-PCR analysis.*
