# Supplementary figures and images for: Adipocyte-released insulin-like growth factor-1 is regulated by glucose and fatty acids and controls breast cancer cell growth in vitro
Source: PubMed Central journal article supplement — Diabetologia. 2012 Jul 15;55(10):2811–22. doi: 10.1007/s00125-012-2629-7 (PMC3433668; doi:10.1007/s00125-012-2629-7), 2012-07-15

ESM Fig. 1

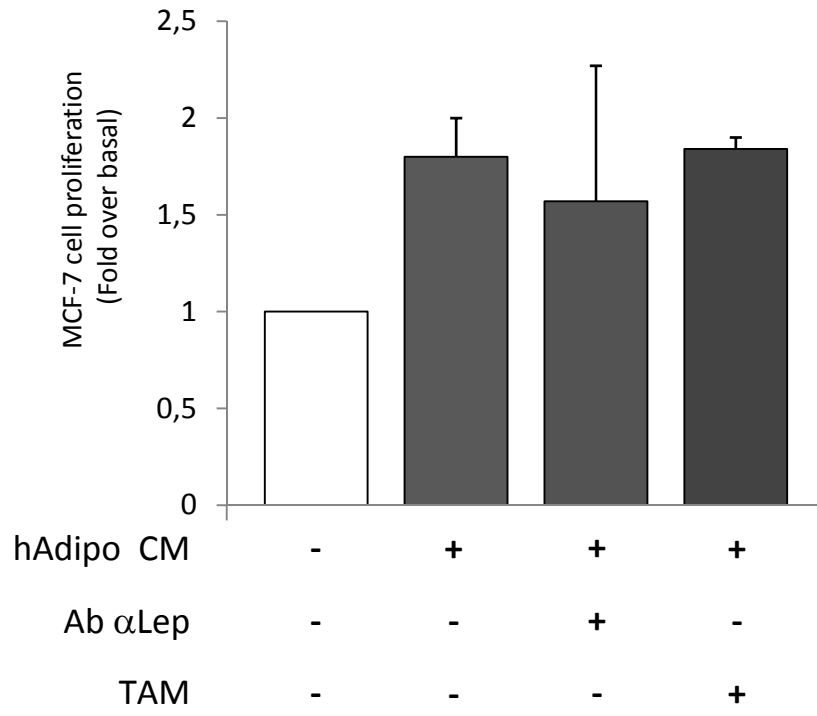

Supplement: 125_2012_2629_MOESM1_ESM.pdf [file 125_2012_2629_MOESM1_ESM.pdf]

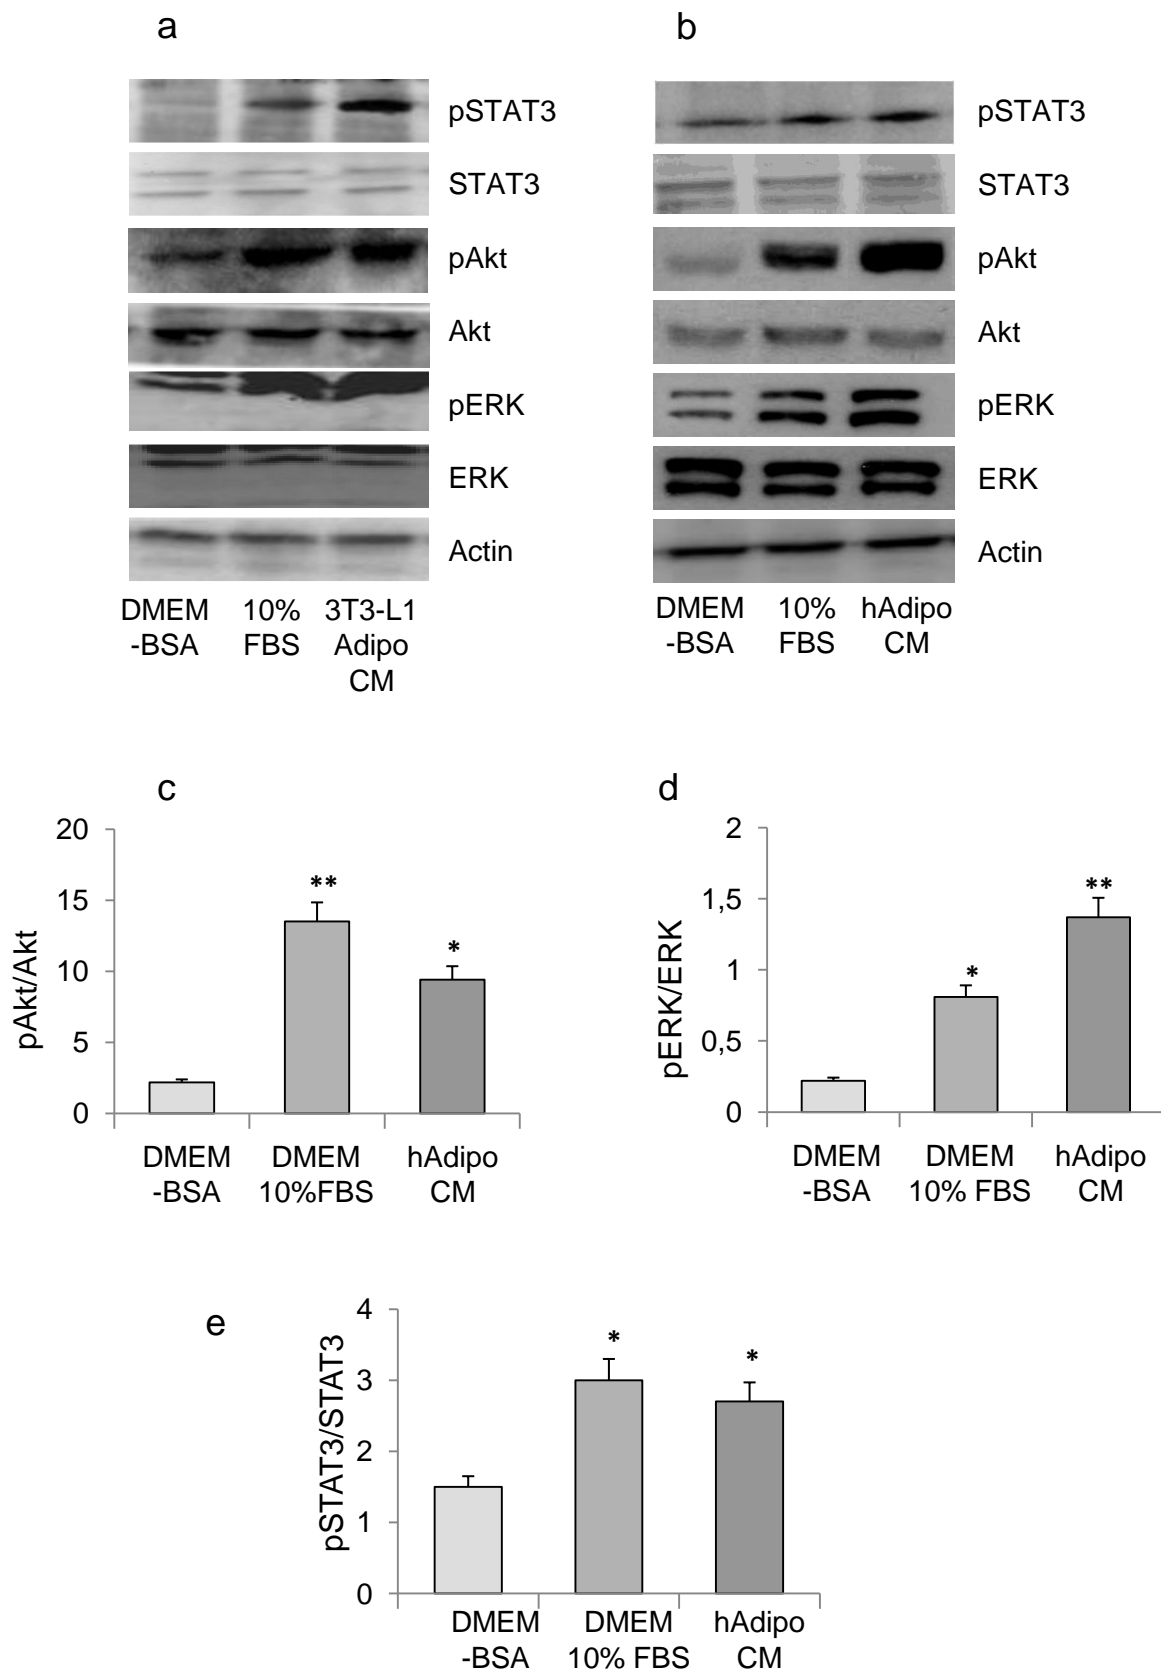

Supplement: 125_2012_2629_MOESM2_ESM.pdf [file 125_2012_2629_MOESM2_ESM.pdf]
